# Supplementary material for: Climatic variation drives loss and restructuring of carbon and nitrogen in boreal forest wildfire
Source: Copernicus journal article supplement (doi:10.5194/bg-19-2487-2022), 2022-05-13
Supplement: Supplementary file 1 [file bg-19-2487-2022-supplement.pdf]

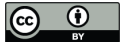

*Supplement of*

## **Climatic variation drives loss and restructuring of carbon and nitrogen in boreal forest wildfire**

**Johan A. Eckdahl et al.**

*Correspondence to:* Johan A. Eckdahl ([johan.eckdahl@nateko.lu.se](mailto:johan.eckdahl@nateko.lu.se))

The copyright of individual parts of the supplement might differ from the article licence.

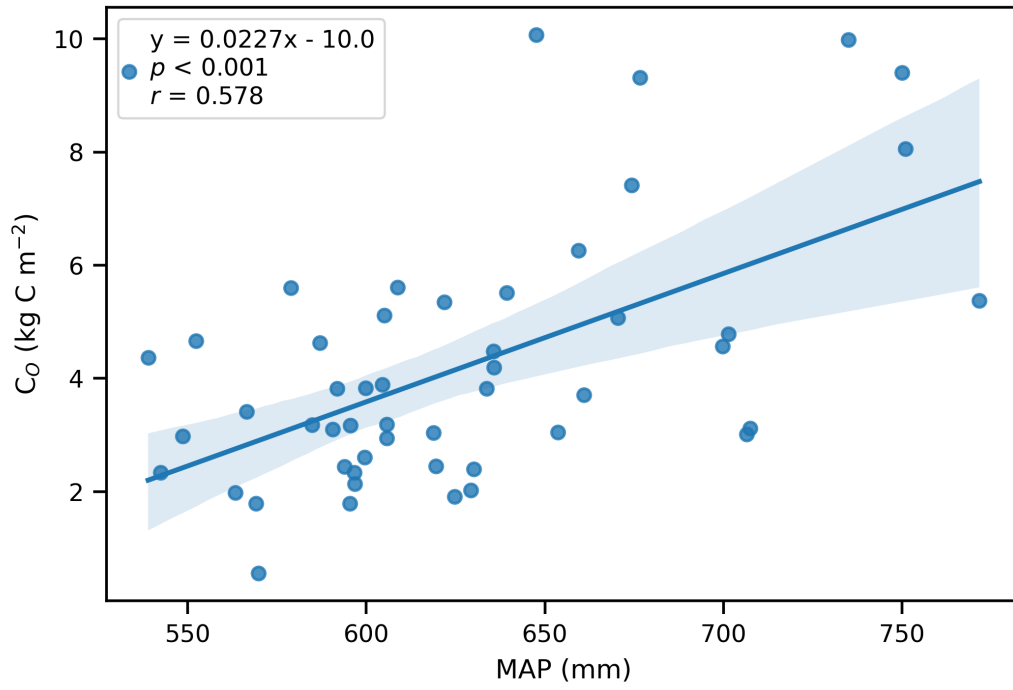

**Fig. S1** Simple regression plot for  $C_O$  versus MAP.

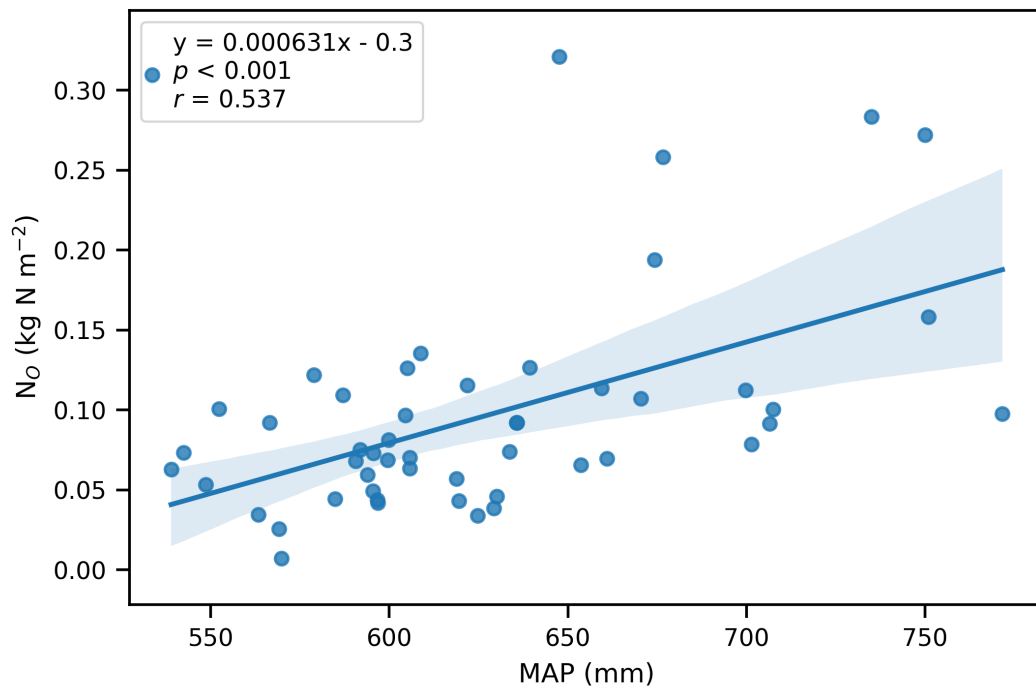

**Fig. S2** Simple regression plot for  $N_O$  versus MAP.

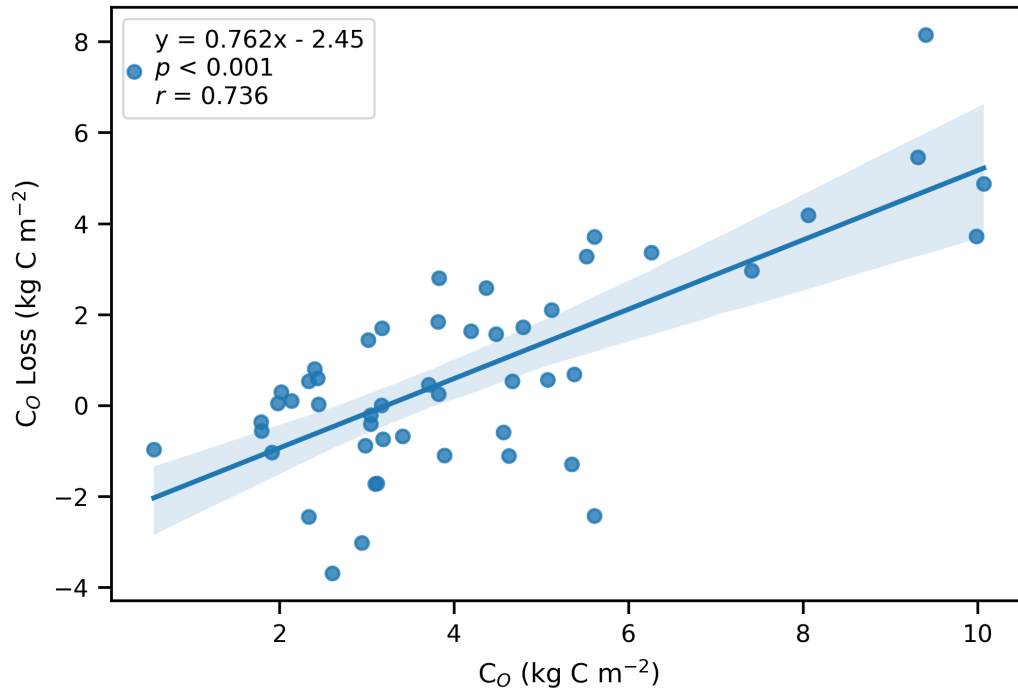

**Fig. S3** Simple regression plot for  $C_O$  loss versus  $C_O$ .

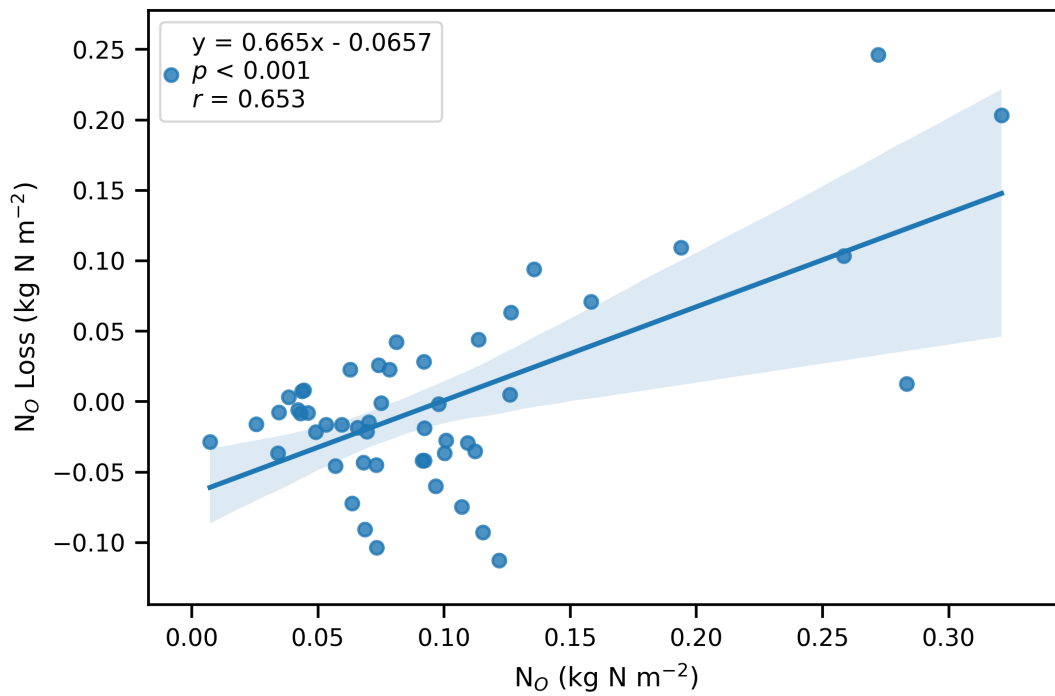

**Fig. S4** Simple regression plot for  $N_O$  loss versus  $N_O$ .

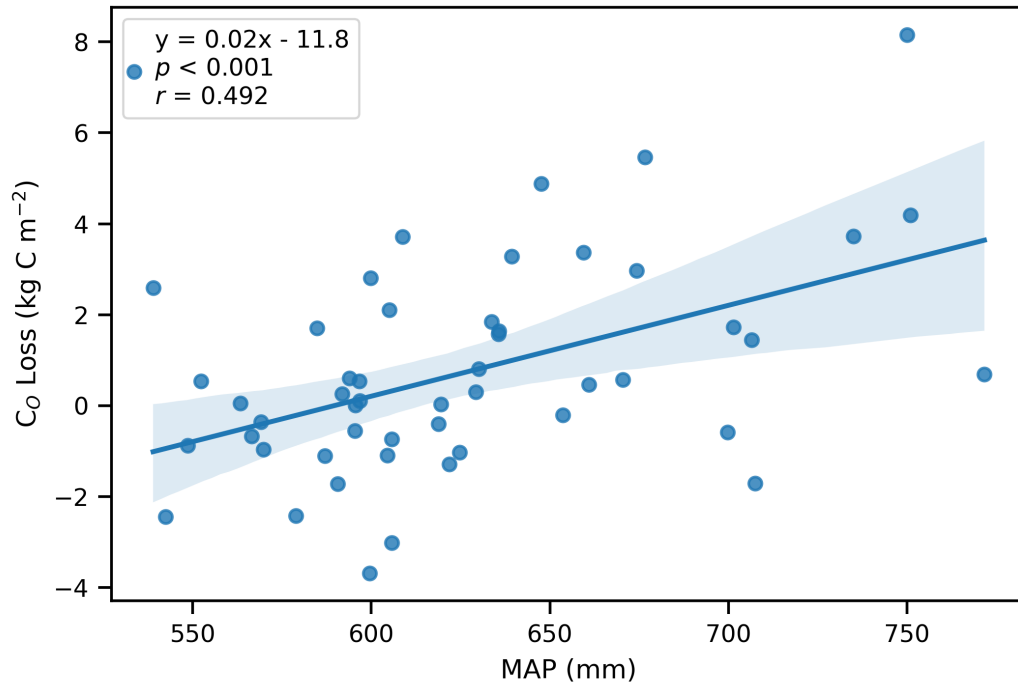

**Fig. S5** Simple regression plot for  $C_O$  loss versus MAP.

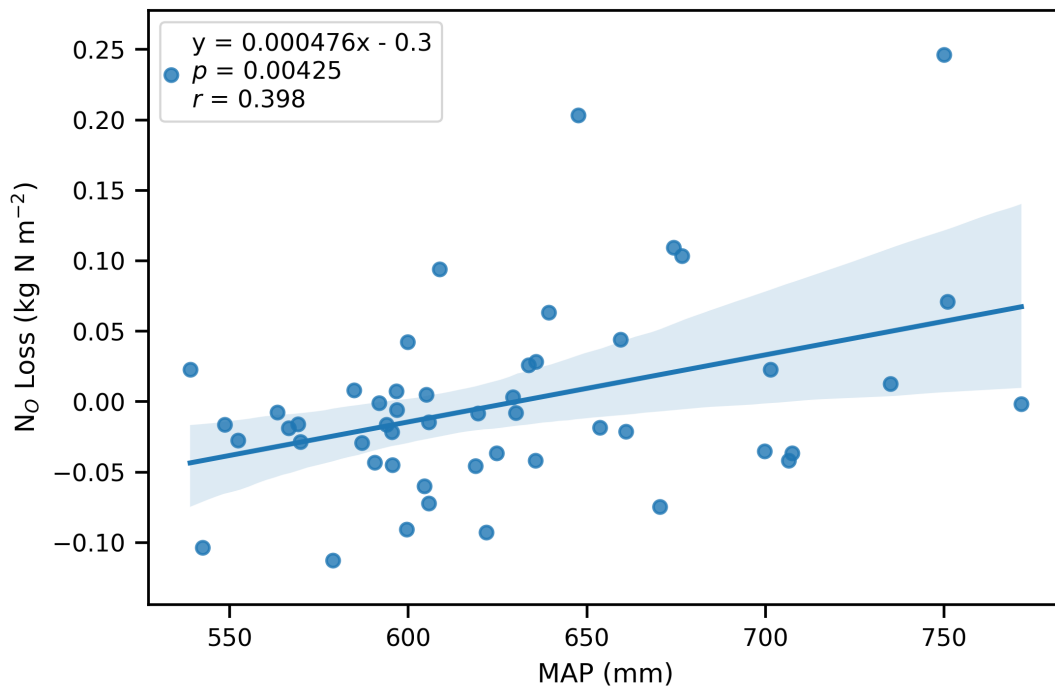

**Fig. S6** Simple regression plot for  $N_O$  loss versus MAP.

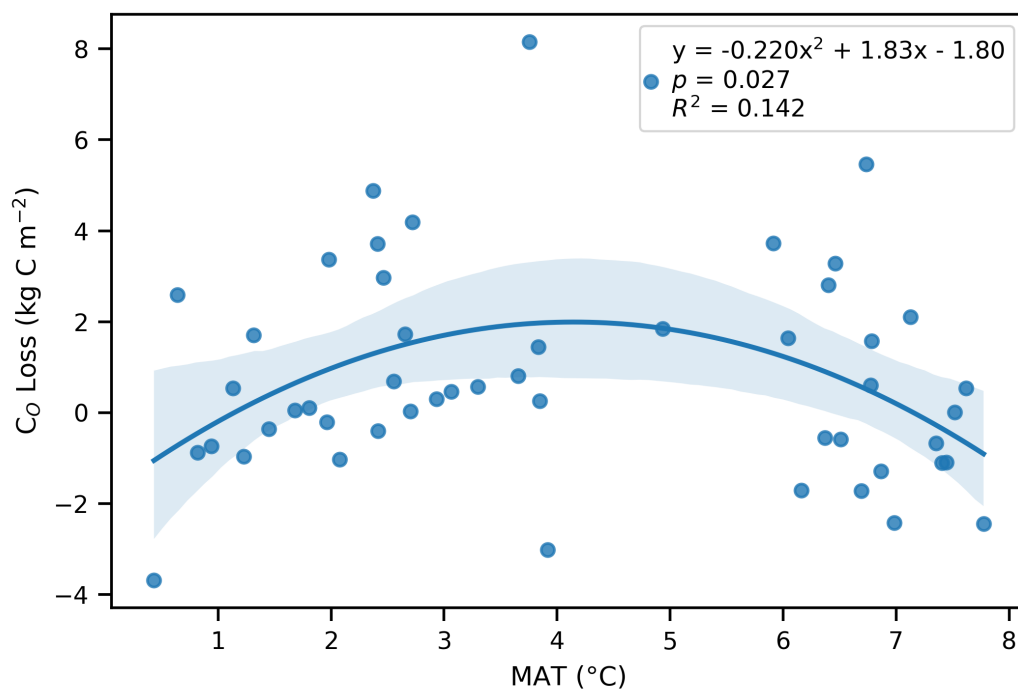

**Fig. S7** C<sub>O</sub> plotted as a function of MAT derived from multiple linear regression of MAT, MAT<sup>2</sup> and a constant.

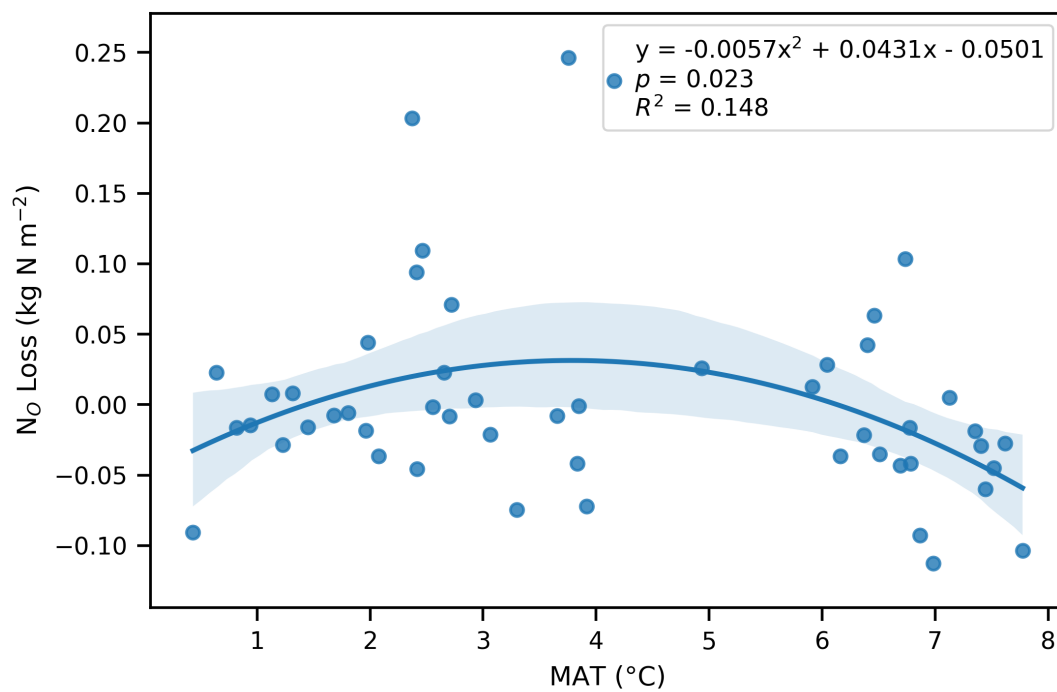

**Fig. S8** N<sub>O</sub> plotted as a function of MAT derived from multiple linear regression of MAT, MAT<sup>2</sup> and a constant.

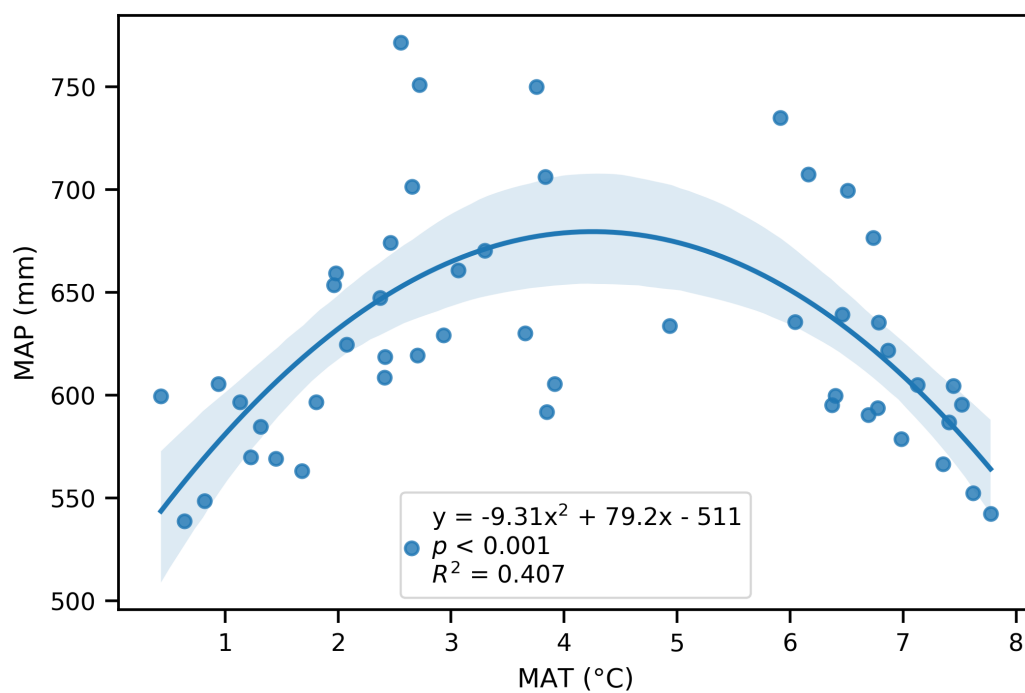

**Fig. S9** MAP plotted as a function of MAT derived from multiple linear regression of MAT, MAT<sup>2</sup> and a constant.
